# Supplementary material
Source: Springer Nature journal article supplement (https://www.springermedizin.de/resource/supplementary/12984_2006_114_MOESM5_ESM.pdf/9605336)
Supplement: MOESM5 [file 9605336]

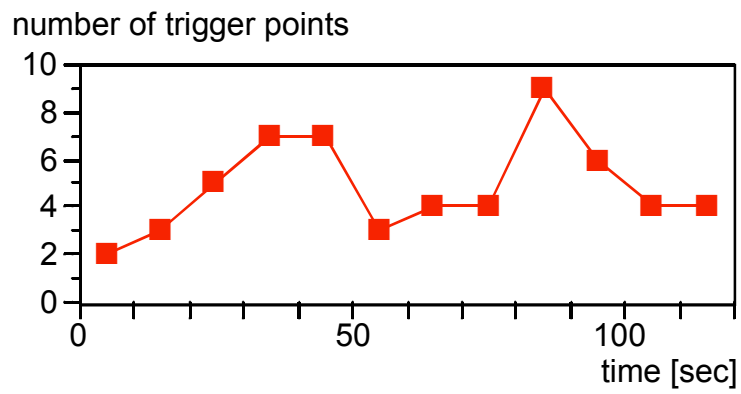

Fig. 5. Time-distribution of the 58 trigger points for 15 subjects at each 10-s segment for virtual 2-min-long vection induced video image.
